# Supplementary material
Source: publisher figshare collection journal article supplement (https://acs.figshare.com/ndownloader/files/5142370)

## SUPPLEMENTARY MATERIAL

Supplementary Figure 1. Chemical structure of Alexa Fluor 532 maleimide

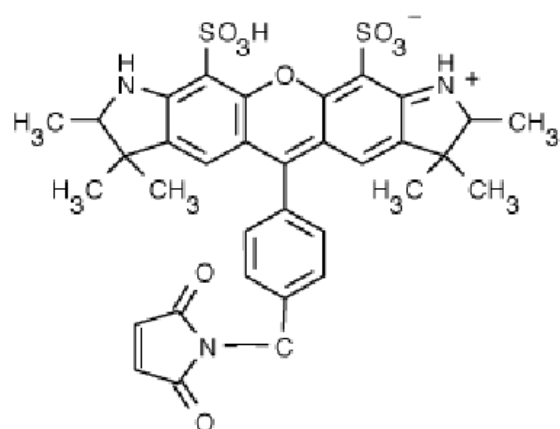

Supplementary Figure 2. Chemical structures of explosive compounds used in this study

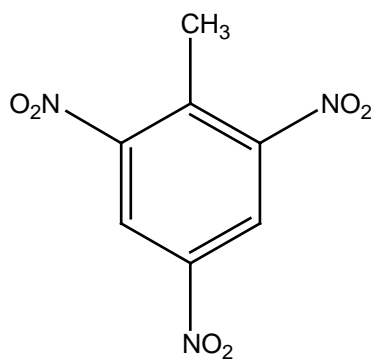

TNT

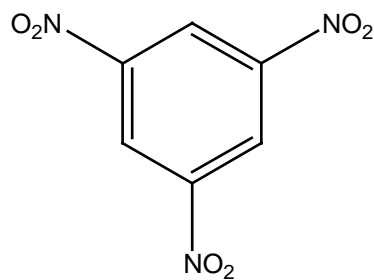

1,3,5 TNB

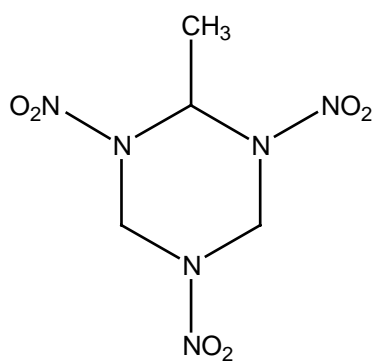

RDX

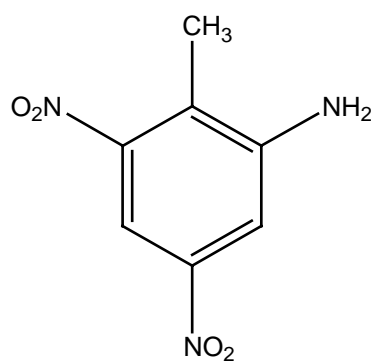

2-amino 4-6 DNT

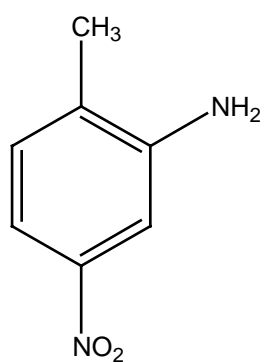

2, 4 DNT

Supplementary Figure 3. Chemical structure of Biotin-X-NTA.

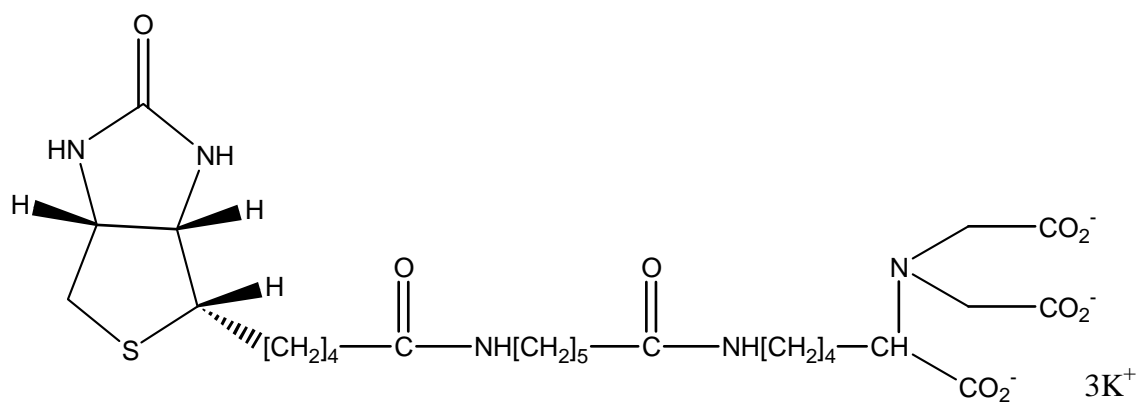

Supplement: Supplementary file 1 [file 5142370]
